# Supplementary material for: Impact of Differentiated Macrophage-Like Cells on the Transcriptional Toxicity Profile of CuO Nanoparticles in Co-Cultured Lung Epithelial Cells
Source: MDPI journal article supplement (doi:10.3390/ijms22095044), 2021-05-10
Supplement: s1 [file s1]

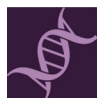

## Supplementary files

# Impact of differentiated macrophage-like cells on the transcriptional toxicity profile of CuO nanoparticles in co-cultured lung epithelial cells

Matthias Hufnagel <sup>1</sup>, Ronja Neuberger <sup>1</sup>, Johanna Wall <sup>1</sup>, Martin Link <sup>1</sup>, Alexandra Friesen<sup>1</sup> and Andrea Hartwig <sup>1,\*</sup>

<sup>1</sup> Department of Food Chemistry and Toxicology, Institute of Applied Biosciences, Faculty of Chemistry and Biosciences, Karlsruhe Institute of Technology (KIT)

\* Correspondence: [andrea.hartwig@kit.edu](mailto:andrea.hartwig@kit.edu)

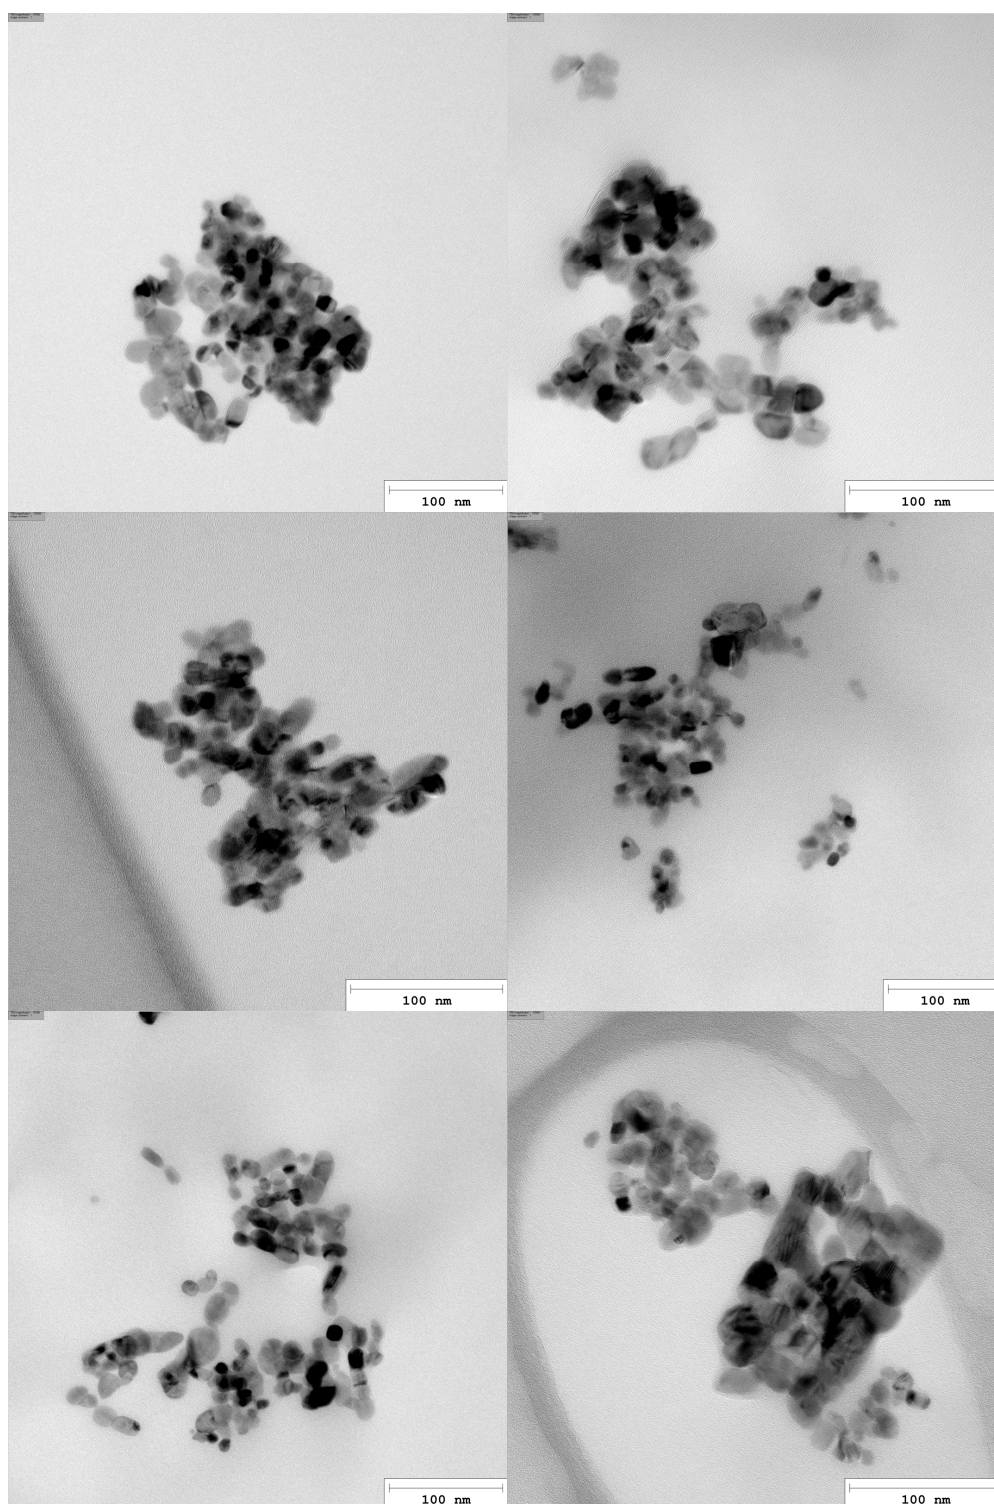

**Supplementary Figure S1.** Representative TEM images of CuO NP at 2.56 mg/mL in 0.05 % BSA after dispersion according to the described dispersion protocol.

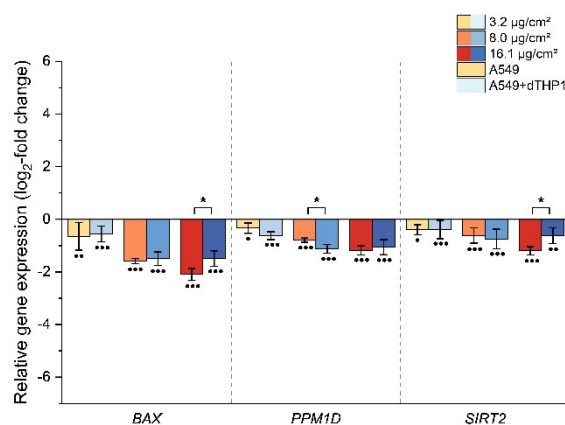

**Supplementary Figure S2.** Impact of CuO NP on genes related to apoptosis in A549 monoculture (A549) and co-culture (A549+dTHP-1) after 24 h incubation. Depicted is the log<sub>2</sub>-fold change of at least three independently conducted experiments  $\pm$  SD. Significantly different from negative controls: •  $\leq 0.05$  (ANOVA-Dunnett's *t*-test); significantly different between cell models: \*  $\leq 0.05$  (unpaired *t*-test).

Supplementary Table S1. Extended primer set for inflammatory response and fibrosis.

| Gene          | Name of the coding protein          | Gene ID | RefSeq         |      | Sequence (5' → 3')       | Position RefSeq (nt) | Position exon | Amplicon-size [bp] | T <sub>m</sub> Amplicon [°C] | Isoform hits    |
|---------------|-------------------------------------|---------|----------------|------|--------------------------|----------------------|---------------|--------------------|------------------------------|-----------------|
| <i>CCL22</i>  | C-C motif chemokine 22 (CCL22)      | 6367    | NM_002990.5    | fwd: | CGTCTGCTGCCGTGATTAC      | 136                  | 2             | 191                | 81                           | NM_002990.5     |
|               |                                     |         |                | rev: | AGTAGGCTCTTCATTGGCTCAG   | 326                  | 3             |                    |                              |                 |
| <i>PTGS2</i>  | Prostaglandin G/H synthase 2 (PGH2) | 5743    | NM_000963.4    | fwd: | CCGAGGTGTATGTATGAGTGTGG  | 85                   | 2             | 136                | 76                           | NM_000963.4     |
|               |                                     |         |                | rev: | TGTGTTTGGAGTGGGTTTCAGA   | 220                  | 3             |                    |                              |                 |
| <i>IL-1a</i>  | Interleukin-1 alpha (IL-1 alpha)    | 3552    | NM_000575.5    | fwd: | GAATGACGCCCTCAATCAAAGT   | 467                  | 5             | 203                | 79                           | NM_000575.5;    |
|               |                                     |         |                | rev: | GCAGCACTGGTTGGTCTTC      | 669                  | 6             |                    |                              | NM_001371554.1  |
| <i>IL-1b</i>  | Interleukin-1 beta (IL-1 beta)      | 3553    | NM_000576.2    | fwd: | GAGGCACAAGGCACAACA       | 16                   | 3             | 186                | 82                           | NM_000576.2     |
|               |                                     |         |                | rev: | CCTGGAAGGAGCACTTCATCT    | 199                  | 4             |                    |                              |                 |
| <i>IL-6</i>   | Interleukin-6 (IL-6)                | 3569    | NM_000600.4    | fwd: | CCAATCTGGATTCAATGAGGAGAC | 427                  | 3-4           | 158                | 80                           | NM_001318095.2  |
|               |                                     |         |                | rev: | GCAGGAAGTGGATCAGGACTT    | 584                  | 4             |                    |                              | NM_001371096.1  |
| <i>TNF</i>    | Tumor necrosis factor (TNF-a)       | 7124    | NM_000594.4    | fwd: | ACACCATGAGCACTGAAAGC     | 173                  | 1             | 225                | 87                           | NM_000594.4     |
|               |                                     |         |                | rev: | CCAGAGGGCTGATTAGAGAGA    | 397                  | 2             |                    |                              |                 |
| <i>ACTA2</i>  | actin, aortic smooth muscle (ACTA2) | 59      | NM_001141945.2 | fwd: | GACCTTTGGCTTGGCTTGT      | 59                   | 1             | 117                | 84                           | NM_001141945.2; |
|               |                                     |         |                | rev: | GGTGCGGACAGGAATTGAAG     | 175                  | 1             |                    |                              | NM_001320855.1; |
|               |                                     |         |                |      |                          |                      |               |                    |                              | NM_001613.4     |
| <i>COL1A1</i> | collagen alpha-1(I) chain (COL1A1)  | 1277    | NM_000088.3    | fwd: | GCCAAGACGAAGACATCCC      | 215                  | 1-2           | 235                | 88                           | NM_000088.3     |
|               |                                     |         |                | rev: | GTGGTTTCTTGGTCGGTGG      | 499                  | 3             |                    |                              |                 |
| <i>CTNNB1</i> | catenin beta-1 (CTNNB1)             | 1499    | NM_001098209.2 | fwd: | CTGAGGAAGAGGATGTGGATACC  | 369                  | 3             | 199                | 81                           | NM_001098209.2; |
|               |                                     |         |                | rev: | TGAGCAGCATCAAACCTGTGTAGA | 567                  | 4             |                    |                              | NM_001098210.2; |
|               |                                     |         |                |      |                          |                      |               |                    |                              | NM_001330729.2; |
|               |                                     |         |                |      |                          |                      |               |                    |                              | NM_001904.4     |
| <i>FN1</i>    | Fibronectin (FN)                    | 2335    | NM_001306129.1 | fwd: | CGGTGGCTGTCAGTCAAAG      | 393                  | 1             | 128                | 81                           | NM_001306129.1; |
|               |                                     |         |                | rev: | ACCTCGGCTTCCTCCATAAC     | 520                  | 2             |                    |                              | NM_001306130.2; |
|               |                                     |         |                |      |                          |                      |               |                    |                              | NM_001306131.2; |
|               |                                     |         |                |      |                          |                      |               |                    |                              | NM_001306132.2; |
|               |                                     |         |                |      |                          |                      |               |                    |                              | NM_001365517.2; |

|              |                                                  |      |             |                                                                |              |          |     |    |                                                                                                                                                                                                                                  |
|--------------|--------------------------------------------------|------|-------------|----------------------------------------------------------------|--------------|----------|-----|----|----------------------------------------------------------------------------------------------------------------------------------------------------------------------------------------------------------------------------------|
|              |                                                  |      |             |                                                                |              |          |     |    | NM_001365518.2;<br>NM_001365519.2;<br>NM_001365520.2;<br>NM_001365521.2;<br>NM_001365522.2;<br>NM_001365523.2;<br>NM_001365524.2;<br>NM_002026.4;<br>NM_054034.3;<br>NM_212474.3;<br>NM_212476.3;<br>NM_212478.3;<br>NM_212482.4 |
| <i>SPP1</i>  | Osteopontin (OPN)                                | 6696 | NM_000582.2 | fwd: TGAATCTGATGAACTGGTCACTGA<br>rev: TGATGTCCTCGTCTGTAGCA     | 504<br>691   | 5<br>6   | 188 | 82 | NM_000582.2;<br>NM_001040058.2;<br>NM_001040060.2;<br>NM_001251829.2;<br>NM_001251830.2                                                                                                                                          |
| <i>PDGFA</i> | Platelet-derived growth factor subunit A (PDGFA) | 5154 | NM_002607.5 | fwd: CGATGAGGACCTTGGCTTG<br>rev: CTTCTCGGGCACATGCTTAG          | 842<br>1074  | 1<br>6   | 233 | 87 | NM_002607.5;<br>NM_033023.5                                                                                                                                                                                                      |
| <i>TGFB1</i> | Transforming growth factor beta-1 (TGFB1)        | 7040 | NM_000660.5 | fwd: GGAAACCCACAACGAAATCTATGA<br>rev: GCTGAGGTATCGCCAGGAAT     | 1181<br>1388 | 1-2<br>3 | 208 | 84 | NM_000660.5                                                                                                                                                                                                                      |
| <i>TIMP1</i> | Metalloproteinase inhibitor 1 (TIMP1)            | 7076 | NM_003254.3 | fwd: GATACTTCCACAGGTCCCAACAAC<br>rev: GGTCCGTCCACAAGCAATGA     | 328<br>564   | 4<br>6   | 237 | 85 | NM_003254.3                                                                                                                                                                                                                      |
| <i>VIM</i>   | Vimentin (VIME)                                  | 7431 | NM_003380.5 | fwd: AAGACGGTTGAACTAGAGATGGA<br>rev: TGTAGGAGTGTTCGGTTGTTAAGAA | 1764<br>1995 | 9<br>10  | 232 | 79 | NM_003380.5                                                                                                                                                                                                                      |

All other used primers of the used gene set were describe in [22], with exception of *ABCB1*, *ABCC1*, *ADH1B*, *ALDH1A1*, *GSTP1*, *NAT1*, *SULT1A1*, *UGT1A*, *SEPP1*, *TP53*, *AXIN2*, *BCL2L1*, *ERCC2*, *POLB*, *OGG1*, and *XRCC5* which were removed from the gene set to open space for inflammatory and fibrotic marker genes.

**Supplementary Table S2.** Log<sub>2</sub>-fold changes in gene expression and p-values of untreated co-culture controls compared to A549 monoculture.

| Gene name        | Log <sub>2</sub> -fold change | p-value | Gene name        | Log <sub>2</sub> -fold change | p-value |
|------------------|-------------------------------|---------|------------------|-------------------------------|---------|
| <i>CYP1A1</i>    | -0.38                         | 0.001   | <i>BCL2</i>      | 0.00                          | 0.992   |
| <i>AHR</i>       | -0.33                         | 0.178   | <i>BTRC</i>      | -0.26                         | 0.002   |
| <i>NQO1</i>      | -0.48                         | 0.000   | <i>CCND1</i>     | -0.50                         | 0.000   |
| <i>CCL22</i>     | 5.00                          | 0.000   | <i>CDKN1A</i>    | 0.49                          | 0.000   |
| <i>PTGS/COX2</i> | -0.22                         | 0.223   | <i>CDKN1B</i>    | -0.29                         | 0.000   |
| <i>IL-1b</i>     | 4.18                          | 0.000   | <i>E2F1</i>      | -0.80                         | 0.000   |
| <i>IL-6</i>      | 0.54                          | 0.262   | <i>EGFR</i>      | -0.12                         | 0.055   |
| <i>IL-8</i>      | 0.15                          | 0.455   | <i>JUN</i>       | 0.27                          | 0.022   |
| <i>ACTA2</i>     | 0.33                          | 0.019   | <i>MDM2</i>      | -0.25                         | 0.004   |
| <i>CTNNB1</i>    | -0.10                         | 0.043   | <i>MYC</i>       | -0.18                         | 0.027   |
| <i>FN1</i>       | 0.17                          | 0.237   | <i>PLK3</i>      | 0.23                          | 0.173   |
| <i>SPP1</i>      | 0.36                          | 0.025   | <i>PMAIP1</i>    | -0.11                         | 0.025   |
| <i>PDGFA</i>     | 0.12                          | 0.209   | <i>PPM1D</i>     | -0.12                         | 0.111   |
| <i>TGFB1</i>     | 0.07                          | 0.284   | <i>SIRT2</i>     | -0.13                         | 0.579   |
| <i>TIMP1</i>     | -0.23                         | 0.010   | <i>TNFRSF10B</i> | -0.32                         | 0.000   |
| <i>VIM</i>       | -0.06                         | 0.506   | <i>VEGFA</i>     | 0.03                          | 0.864   |
| <i>FTH1</i>      | 0.21                          | 0.309   | <i>XIAP</i>      | -0.11                         | 0.255   |
| <i>MT1X</i>      | -0.20                         | 0.016   | <i>APEX1</i>     | -0.19                         | 0.049   |
| <i>MT2A</i>      | -0.43                         | 0.001   | <i>ATM</i>       | -0.24                         | 0.000   |
| <i>SLC30A1</i>   | -0.14                         | 0.150   | <i>ATR</i>       | -0.48                         | 0.000   |
| <i>TFRC</i>      | -0.19                         | 0.138   | <i>BRCA1</i>     | -0.31                         | 0.004   |
| <i>CAT</i>       | -0.26                         | 0.000   | <i>BRCA2</i>     | -0.41                         | 0.000   |
| <i>G6PD</i>      | -0.59                         | 0.000   | <i>DDB1</i>      | -0.35                         | 0.008   |
| <i>GCLC</i>      | -0.30                         | 0.000   | <i>DDB2</i>      | 0.03                          | 0.840   |
| <i>GPX1</i>      | 0.30                          | 0.026   | <i>DDIT3</i>     | 0.66                          | 0.002   |
| <i>GPX2</i>      | -0.21                         | 0.031   | <i>ERCC1</i>     | -0.24                         | 0.013   |
| <i>GSR</i>       | -0.51                         | 0.000   | <i>ERCC4/XPF</i> | -0.42                         | 0.000   |
| <i>HMOX1</i>     | 0.61                          | 0.000   | <i>ERCC5/XPG</i> | -0.33                         | 0.000   |
| <i>HSPA1A</i>    | -0.54                         | 0.001   | <i>GADD45A</i>   | 0.43                          | 0.003   |
| <i>KEAP1</i>     | -0.29                         | 0.004   | <i>LIG1</i>      | -0.50                         | 0.000   |
| <i>MAP3K5</i>    | -0.15                         | 0.057   | <i>LIG3</i>      | -0.51                         | 0.000   |
| <i>NFE2L2</i>    | -0.17                         | 0.071   | <i>MGMT</i>      | -0.11                         | 0.417   |
| <i>NFKB1</i>     | -0.06                         | 0.283   | <i>MLH1</i>      | -0.49                         | 0.000   |
| <i>NFKB2</i>     | 0.49                          | 0.005   | <i>MSH2</i>      | -0.27                         | 0.000   |
| <i>NFKBIA</i>    | 0.25                          | 0.275   | <i>PARP1</i>     | -0.40                         | 0.001   |
| <i>PRDX1</i>     | -0.33                         | 0.012   | <i>PCNA</i>      | -0.24                         | 0.014   |
| <i>SOD1</i>      | -0.31                         | 0.010   | <i>POLD1</i>     | -0.24                         | 0.071   |
| <i>SOD2</i>      | 0.15                          | 0.196   | <i>POLQ</i>      | -0.49                         | 0.000   |
| <i>TXN</i>       | -0.45                         | 0.000   | <i>RAD50</i>     | 0.04                          | 0.674   |
| <i>TXNRD1</i>    | -0.57                         | 0.000   | <i>RAD51</i>     | -0.41                         | 0.000   |
| <i>APAF1</i>     | -0.07                         | 0.467   | <i>RRM2B</i>     | -0.20                         | 0.044   |
| <i>BAX</i>       | 0.02                          | 0.707   | <i>XPC</i>       | -0.19                         | 0.024   |

|      |      |       |
|------|------|-------|
| BBC3 | 0.35 | 0.089 |
|------|------|-------|

**Supplementary Table S3.** X-fold changes in gene expression treated mono- and co-cultures compared to untreated controls.  
N.q.: not quantifiable.

| Dose (µg/mL)     | A549 |      |      | A549+dTHP-1 |      |      |
|------------------|------|------|------|-------------|------|------|
|                  | 3.2  | 8.0  | 16.1 | 3.2         | 8.0  | 16.1 |
| <i>AHR</i>       | 0.2  | 0.1  | 0.1  | 0.4         | 0.1  | 0.1  |
| <i>CYP1A1</i>    | 4.5  | 6.0  | 6.2  | 3.9         | 7.0  | 4.9  |
| <i>NQO1</i>      | 0.5  | 0.5  | 0.6  | 0.6         | 0.5  | 0.6  |
| <i>CCL22</i>     | 1.0  | 1.8  | 2.6  | 0.2         | 0.1  | 0.0  |
| <i>PTGS/COX2</i> | 0.1  | 0.1  | 0.1  | 0.4         | 0.1  | 0.2  |
| <i>IL-1a</i>     | n.q. | n.q. | n.q. | 7.4         | 5.6  | 2.0  |
| <i>IL-1b</i>     | 0.5  | 0.6  | 0.5  | 0.2         | 0.2  | 0.1  |
| <i>IL-6</i>      | 0.5  | 0.7  | 0.6  | 6.1         | 6.2  | 1.7  |
| <i>IL-8</i>      | 2.6  | 19.9 | 50.3 | 4.0         | 14.4 | 37.8 |
| <i>TNF-α</i>     | n.q. | n.q. | n.q. | 0.5         | 0.4  | 0.3  |
| <i>ACTA2</i>     | 0.2  | 0.1  | 0.2  | 0.5         | 0.1  | 0.2  |
| <i>COL1A1</i>    | n.q. | n.q. | n.q. | 1.1         | 0.6  | 1.2  |
| <i>CTNNA1</i>    | 0.7  | 0.4  | 0.3  | 0.8         | 0.5  | 0.4  |
| <i>FN1</i>       | 0.4  | 0.5  | 0.6  | 0.5         | 0.4  | 0.6  |
| <i>SPP1</i>      | 0.8  | 0.6  | 0.5  | 0.6         | 0.6  | 0.7  |
| <i>PDGFA</i>     | 0.3  | 0.1  | 0.0  | 0.4         | 0.1  | 0.1  |
| <i>TGFB1</i>     | 0.5  | 0.5  | 0.5  | 0.7         | 0.5  | 0.5  |
| <i>TIMP1</i>     | 0.7  | 1.1  | 1.2  | 0.8         | 1.2  | 1.6  |
| <i>VIM</i>       | 0.5  | 0.4  | 0.7  | 0.6         | 0.5  | 0.6  |
| <i>FTH1</i>      | 1.5  | 1.2  | 0.8  | 1.7         | 1.3  | 0.9  |
| <i>MT1X</i>      | 2.3  | 8.5  | 8.8  | 34.0        | 8.0  | 7.6  |
| <i>MT2A</i>      | 1.3  | 13.2 | 12.6 | 25.6        | 14.7 | 14.3 |
| <i>SLC30A1</i>   | 2.1  | 0.6  | 0.6  | 2.4         | 0.7  | 0.7  |
| <i>TFRC</i>      | 0.9  | 0.2  | 0.2  | 1.5         | 0.4  | 0.2  |
| <i>CAT</i>       | 0.5  | 0.3  | 0.3  | 0.7         | 0.4  | 0.4  |
| <i>G6PD</i>      | 0.4  | 0.5  | 0.5  | 0.6         | 0.5  | 0.5  |
| <i>GCLC</i>      | 0.4  | 0.2  | 0.1  | 0.5         | 0.2  | 0.2  |
| <i>GPX1</i>      | 0.7  | 0.8  | 0.8  | 0.5         | 0.5  | 0.8  |
| <i>GPX2</i>      | 0.3  | 0.2  | 0.2  | 0.4         | 0.2  | 0.4  |
| <i>GSR</i>       | 0.9  | 0.8  | 0.8  | 1.1         | 1.1  | 0.8  |
| <i>HMOX1</i>     | 22.6 | 28.4 | 23.6 | 12.1        | 21.9 | 21.7 |
| <i>HSPA1A</i>    | 16.7 | 57.6 | 58.5 | 16.0        | 68.2 | 69.8 |
| <i>KEAP1</i>     | 0.3  | 0.1  | 0.1  | 0.5         | 0.1  | 0.1  |
| <i>MAP3K5</i>    | 0.4  | 0.1  | 0.1  | 0.4         | 0.1  | 0.1  |
| <i>NFE2L2</i>    | 0.5  | 0.1  | 0.1  | 0.6         | 0.2  | 0.1  |
| <i>NFKB1</i>     | 0.8  | 0.3  | 0.2  | 1.0         | 0.5  | 0.3  |



|                  |      |      |      |      |      |      |
|------------------|------|------|------|------|------|------|
| <i>NFKB2</i>     | 3.0  | 1.0  | 0.5  | 2.8  | 0.9  | 0.5  |
| <i>NFKBIA</i>    | 0.9  | 0.2  | 0.0  | 1.3  | 0.2  | 0.0  |
| <i>PRDX1</i>     | 1.0  | 1.2  | 1.3  | 1.1  | 1.6  | 1.4  |
| <i>SOD1</i>      | 1.0  | 1.1  | 1.2  | 1.1  | 1.6  | 1.4  |
| <i>SOD2</i>      | 1.1  | 1.3  | 1.1  | 2.6  | 2.7  | 1.9  |
| <i>TXN</i>       | 0.8  | 1.0  | 1.3  | 1.0  | 1.6  | 1.6  |
| <i>TXNRD1</i>    | 0.8  | 0.8  | 1.0  | 1.1  | 1.0  | 1.2  |
| <i>APAF1</i>     | 0.7  | 0.3  | 0.1  | 0.7  | 0.3  | 0.2  |
| <i>BAX</i>       | 0.6  | 0.3  | 0.2  | 0.7  | 0.4  | 0.4  |
| <i>BBC3</i>      | 0.2  | 0.1  | 0.1  | 0.4  | 0.1  | 0.1  |
| <i>BCL2</i>      | 0.5  | 0.2  | 0.3  | 0.4  | 0.2  | 0.2  |
| <i>BTRC</i>      | 0.8  | 0.7  | 0.6  | 0.8  | 0.8  | 0.7  |
| <i>CCND1</i>     | 0.5  | 0.4  | 0.4  | 0.6  | 0.4  | 0.3  |
| <i>CDKN1A</i>    | 1.0  | 0.8  | 0.5  | 1.0  | 0.7  | 0.5  |
| <i>CDKN1B</i>    | 0.2  | 0.1  | 0.0  | 0.3  | 0.1  | 0.1  |
| <i>CDKN2B</i>    | n.q. | n.q. | n.q. | n.q. | n.q. | n.q. |
| <i>E2F1</i>      | 0.9  | 0.5  | 0.6  | 1.3  | 0.5  | 0.6  |
| <i>EGFR</i>      | 0.6  | 0.4  | 0.4  | 0.9  | 0.4  | 0.4  |
| <i>JUN</i>       | 1.2  | 2.3  | 3.5  | 1.0  | 1.4  | 2.6  |
| <i>MDM2</i>      | 0.5  | 0.3  | 0.3  | 0.6  | 0.4  | 0.3  |
| <i>MYC</i>       | 0.3  | 0.1  | 0.0  | 0.4  | 0.1  | 0.0  |
| <i>PLK3</i>      | 0.6  | 0.2  | 0.1  | 0.7  | 0.2  | 0.2  |
| <i>PMAIP1</i>    | 0.9  | 0.8  | 0.7  | 1.1  | 0.9  | 0.9  |
| <i>PPM1D</i>     | 0.8  | 0.6  | 0.4  | 0.6  | 0.5  | 0.5  |
| <i>SIRT2</i>     | 0.8  | 0.7  | 0.4  | 0.8  | 0.6  | 0.6  |
| <i>TNFRSF10B</i> | 1.1  | 0.7  | 0.6  | 1.4  | 0.9  | 0.9  |
| <i>VEGFA</i>     | 1.4  | 0.6  | 0.4  | 1.5  | 0.6  | 0.5  |
| <i>XIAP</i>      | 0.7  | 0.5  | 0.6  | 0.7  | 0.7  | 0.6  |
| <i>APEX1</i>     | 0.7  | 0.3  | 0.4  | 0.8  | 0.4  | 0.5  |
| <i>ATM</i>       | 0.5  | 0.3  | 0.3  | 0.7  | 0.3  | 0.4  |
| <i>ATR</i>       | 0.6  | 0.2  | 0.1  | 0.7  | 0.3  | 0.1  |
| <i>BRCA1</i>     | 0.8  | 0.2  | 0.1  | 1.0  | 0.3  | 0.2  |
| <i>BRCA2</i>     | 0.9  | 0.2  | 0.1  | 1.2  | 0.4  | 0.2  |
| <i>DDB1</i>      | 0.6  | 0.5  | 0.5  | 0.8  | 0.6  | 0.5  |
| <i>DDB2</i>      | 0.5  | 0.1  | 0.1  | 0.7  | 0.1  | 0.1  |
| <i>DDIT3</i>     | 6.0  | 14.9 | 18.2 | 4.6  | 7.2  | 22.5 |
| <i>ERCC1</i>     | 0.5  | 0.5  | 0.6  | 0.6  | 0.5  | 0.7  |
| <i>ERCC4/XPF</i> | 0.3  | 0.1  | 0.0  | 0.4  | 0.1  | 0.1  |
| <i>ERCC5/XPG</i> | 0.3  | 0.2  | 0.1  | 0.4  | 0.2  | 0.1  |
| <i>GADD45A</i>   | 2.5  | 3.3  | 3.1  | 2.3  | 3.5  | 5.3  |
| <i>LIG1</i>      | 0.6  | 0.3  | 0.2  | 0.8  | 0.3  | 0.3  |
| <i>LIG3</i>      | 0.4  | 0.2  | 0.2  | 0.5  | 0.3  | 0.2  |
| <i>MGMT</i>      | 0.6  | 0.9  | 1.0  | 0.6  | 0.7  | 1.1  |
| <i>MLH1</i>      | 0.7  | 0.3  | 0.2  | 10   | 0.4  | 0.3  |
| <i>MSH2</i>      | 0.7  | 0.2  | 0.1  | 0.8  | 0.2  | 0.2  |
| <i>PARP1</i>     | 0.7  | 0.4  | 0.4  | 0.8  | 0.4  | 0.4  |
| <i>PCNA</i>      | 0.8  | 0.1  | 0.0  | 0.9  | 0.2  | 0.1  |

---

|              |      |      |      |      |      |      |
|--------------|------|------|------|------|------|------|
| <i>POLD1</i> | 0.9  | 0.3  | 0.2  | 1.0  | 0.4  | 0.3  |
| <i>POLQ</i>  | 0.6  | 0.3  | 0.3  | 0.9  | 0.3  | 0.4  |
| <i>RAD50</i> | 0.4  | 0.2  | 0.2  | 0.5  | 0.2  | 0.3  |
| <i>RAD51</i> | 1.4  | 0.2  | 0.1  | 1.7  | 0.4  | 0.1  |
| <i>RRM2B</i> | 0.5  | 0.3  | 0.3  | 0.7  | 0.4  | 0.3  |
| <i>XPA</i>   | n.q. | n.q. | n.q. | n.q. | n.q. | n.q. |
| <i>XPC</i>   | 0.3  | 0.1  | 0.1  | 0.5  | 0.1  | 0.1  |

---
